# Supplementary material for: Sterile α-motif domain requirement for cellular signaling and survival
Source: PubMed Central journal article supplement (PMC7242717; doi:10.1074/jbc.ra119.011895), 2020-04-02

## Supporting Information – Ray et al.

### Figure Legends

**Supplementary Table 1** – Percentages of GFP<sup>+</sup> cells (representing retrovirally-infected) in each experiment.

**Supplementary Figure 1** - Representative flow cytometric histogram plots of pAKT and pERK staining after gating for GFP<sup>+</sup>Kit<sup>+</sup>CD71<sup>+</sup> retrovirally-infected cells. Related to data presented in Figure 1F.

**Supplementary Figure 2** - Co-localization of Samd14 and c-Kit. (A) Representative structured illumination microscopy (SIM) images of spleen erythroid progenitors retrovirally-infected with HA-tagged Samd14 and a SAM domain-deleted mutant of Samd14 (S14  $\Delta$ SAM) stained with rabbit anti-HA antibody and AlexaFluor 594 (red), mouse anti-c-Kit antibody and AlexaFluor 647 (green), and DAPI (blue) in presence and absence of stem cell factor (-SCF/+SCF). 63X magnification, Scale bar = 2  $\mu$ m (B) Pearson's correlation coefficient for Samd14 and c-Kit co-localization. (C) Pearson's correlation coefficient of Samd14 and DAPI co-localization. (D) Orthogonal projections of z-stack of spleen erythroid progenitors retrovirally-infected with HA-tagged Samd14 and S14  $\Delta$ SAM stained with antibodies for Samd14 (red), c-Kit (green), and DAPI (blue) in presence and absence of stem cell factor (-SCF/+SCF). 63X magnification, Scale bar = 2  $\mu$ m. \*p < 0.05 (two-tailed unpaired Student's t test).

**Supplementary Figure 3** - Gating strategy for analysis of SCF-stimulated GFP<sup>+</sup>Kit<sup>+</sup> cultures. (left) Representative flow cytometric analysis of GFP and forward scatter (FSC)

following retroviral infection in Samd14-Enh<sup>-/-</sup> spleen cultures. (right) Cells were subsequently gated for CD71 and c-Kit.

**Supplementary Figure 4 - Samd14 or Samd14  $\Delta$  SAM Expression in Samd14-Enh<sup>-/-</sup> Bone Marrow.** (A) Representative flow cytometric analysis of SCF-stimulated GFP<sup>+</sup>Kit<sup>+</sup> bone marrow cultures. (B) Quantitation of pAKT median fluorescence intensity (MFI) at 5 and 10 min post-stimulation with SCF (50 ng/mL) (N=3 in each condition). Error bars represent the standard error of the mean.

**Supplementary Figure 5 - Dissecting Samd14 SAM Domain Activities in Cellular Survival with Chimeric SAM Domain Proteins.** (A) Representative flow cytometric analysis of non-cell membrane permeating DNA dye (Draq7) and anti-Annexin V Pacific Blue (AnnV). Cells were first segregated based on GFP, CD71, Ter119 and c-Kit. Draq7<sup>-</sup>AnnV<sup>-</sup> = live, Draq7<sup>-</sup>AnnV<sup>+</sup> = early apoptotic (EA), and Draq7<sup>+</sup>AnnV<sup>+</sup> = late apoptotic (LA). (B) Quantitation of flow cytometric analysis of non-cell membrane permeating DNA dye (Draq7) and anti-Annexin V Pacific Blue (AnnV). Cells were first segregated based on GFP<sup>+</sup>, CD71<sup>+</sup>, Ter119<sup>-</sup> and c-Kit<sup>+</sup> (N=3). Error bars represent the standard error of the mean (SEM). \*p < 0.05; \*\*p < 0.01; \*\*\*p < 0.001 (two-tailed unpaired Student's t test).

**Supplementary Figure 6 - Localization of Samd14 chimeras.** Representative immunofluorescence images of spleen erythroid progenitors retrovirally-infected with HA-tagged Samd14, Samd14 with SAM domain sequence of Neurabin-1 (S14-cNeb1) and Samd14 with SAM domain sequence of SHIP-2 (S14-cS2), stained with rabbit anti-HA antibody and AlexaFluor 594 (red) and DAPI (blue). 63X magnification, Scale bar = 10  $\mu$ m.

**Supplementary Figure 7 - Samd14 SAM domain increases the frequency of cells expressing BFU-E-associated surface markers in spleen progenitors.** (A) Gating strategy and representative flow cytometric analysis of retrovirally-infected Kit<sup>+</sup>CD71<sup>low</sup> and Kit<sup>+</sup>CD71<sup>low</sup> in empty vector (EV), HA-tagged Samd14, a SAM domain-deleted mutant of Samd14 (Samd14  $\Delta$ SAM), Samd14 with SAM domain sequence of Neurabin-1 (S14-cNeb1) and Samd14 with SAM domain sequence of SHIP-2 (S14-cS2). FSC=forward scatter. (B) Left - Quantitation of the percent of retrovirally-infected Kit<sup>+</sup>CD71<sup>low</sup> (N=3 in each condition). Right - Quantitation of the percent of retrovirally-infected Kit<sup>+</sup>CD71<sup>high</sup> (right) (N=3 in each condition). \* p < 0.05; \*\*\*\* p < 0.0001 (two-tailed unpaired Student's t test).

## % GFP+ (related to Figure 1)

|             |         | N1         | N2   | N3   | N4   | N5   | N6   |
|-------------|---------|------------|------|------|------|------|------|
| WT          | EV 0 m  | 30.3       | 28.6 | 27.1 | 13.3 | 30.3 | 28.6 |
|             | EV 2 m  | 33.7       | 26.4 | 21.7 | 25.2 | 33.7 | 26.4 |
|             | EV 5 m  | 40.6       | 27.3 | 26.2 | 24.8 | 40.6 | 27.3 |
|             | EV 10 m | 44.5       | 34.7 | 31.6 | 19.5 | 44.5 | 34.7 |
|             | EV 15 m | 19.9       | 25   | 24.6 | 28.4 | 19.9 | 25   |
|             | EV 20 m | 17.5       | 17.8 | 26.1 | 21.9 | 17.5 | 17.8 |
|             | Enh-/-  | Samd14 0 m | 20.7 | 20.5 | 38.9 | 16   | 20.7 |
| Samd14 2 m  |         | 20.9       | 19.5 | 17.6 | 22.8 | 20.9 | 19.5 |
| Samd14 5 m  |         | 38.7       | 51.6 | 24.3 | 25.5 | 38.7 | 51.6 |
| Samd14 10 m |         | 34.3       | 44.3 | 36.2 | 59.2 | 34.3 | 44.3 |
| Samd14 15 m |         | 29.3       | 42.2 | 42.3 | 55.4 | 29.3 | 42.2 |
| Samd14 20 m |         | 24.2       | 43.6 | 32.8 | 43.1 | 24.2 | 43.6 |

## % GFP+ (related to Figure 4C and D)

|           | N1   | N2   | N3   |
|-----------|------|------|------|
| EV        | 27.8 | 33.8 | 32.8 |
| Samd14    | 23.1 | 22.4 | 21.3 |
| delta SAM | 42.8 | 45.5 | 41.5 |

## % GFP+ (related to Figure 5C, E, G, H)

|            | N1   | N2   | N3   | N4   |
|------------|------|------|------|------|
| EV 0 m     | 23.6 | 32.4 | 20.4 | 49.2 |
| EV 2 m     | 35.2 | 37   | 40.2 | 49.8 |
| EV 5 m     | 41.8 | 28.7 | 41.2 | 50.9 |
| EV 10 m    | 18.3 | 34.5 | 40   | 51.4 |
| Samd14 0 m | 5.87 | 16.1 | 30.9 | 40.4 |
| Samd14 2 m | 21.6 | 19.2 | 31.2 | 38.2 |
| Samd14 5 m | 18.3 | 22.7 | 29.1 | 33.1 |
| Samd14 10  | 12.6 | 23.5 | 31.4 | 37.3 |
| deltaSAM 0 | 42.8 | 42.1 | 45   | 18.1 |
| deltaSAM 2 | 36.8 | 35.8 | 41.5 | 17.4 |
| deltaSAM 5 | 39.7 | 25.9 | 41.5 | 18.6 |
| deltaSAM 1 | 30.8 | 36.9 | 42.3 | 18.4 |

## % GFP+ (related to Figure 6D-G)

|           | N1   | N2   | N3   | N4   |
|-----------|------|------|------|------|
| Ev        | 32.4 | 33.2 | 24.7 | 27.5 |
| Samd14    | 27.5 | 33   | 29.5 | 34.5 |
| deltaSAM  | 29.8 | 32.2 | 30   | 30.7 |
| S14-cNeb1 | 33.7 | 32.2 | 34.3 | 21.4 |
| S14-cS2   | 32.6 | 24.8 | 33.3 | 22.8 |

## % GFP+ (related to Figure 7C,D)

|           | N1   | N2   | N3   |
|-----------|------|------|------|
| Ev        | 27.7 | 29   | 28.4 |
| Samd14    | 31.8 | 31.8 | 31.9 |
| S14-cNeb1 | 32.7 | 33.1 | 33.2 |
| S14-mc1   | 30   | 31.5 | 31.3 |
| S14-mc2   | 30.8 | 31.7 | 31.3 |
| S14-mc3   | 40.5 | 39.8 | 40.5 |

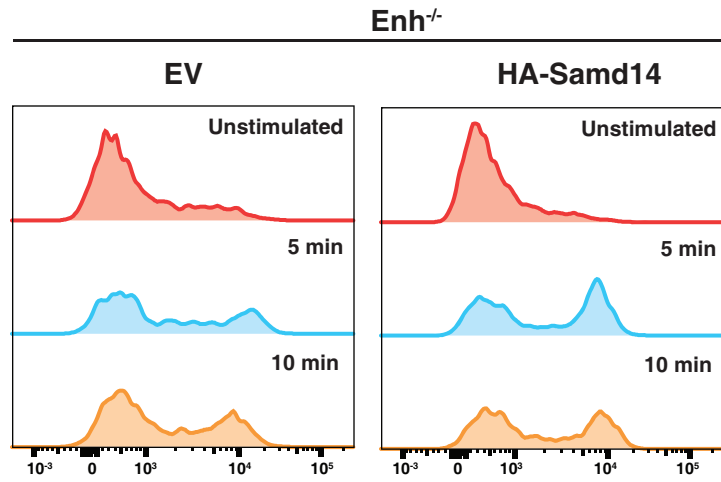

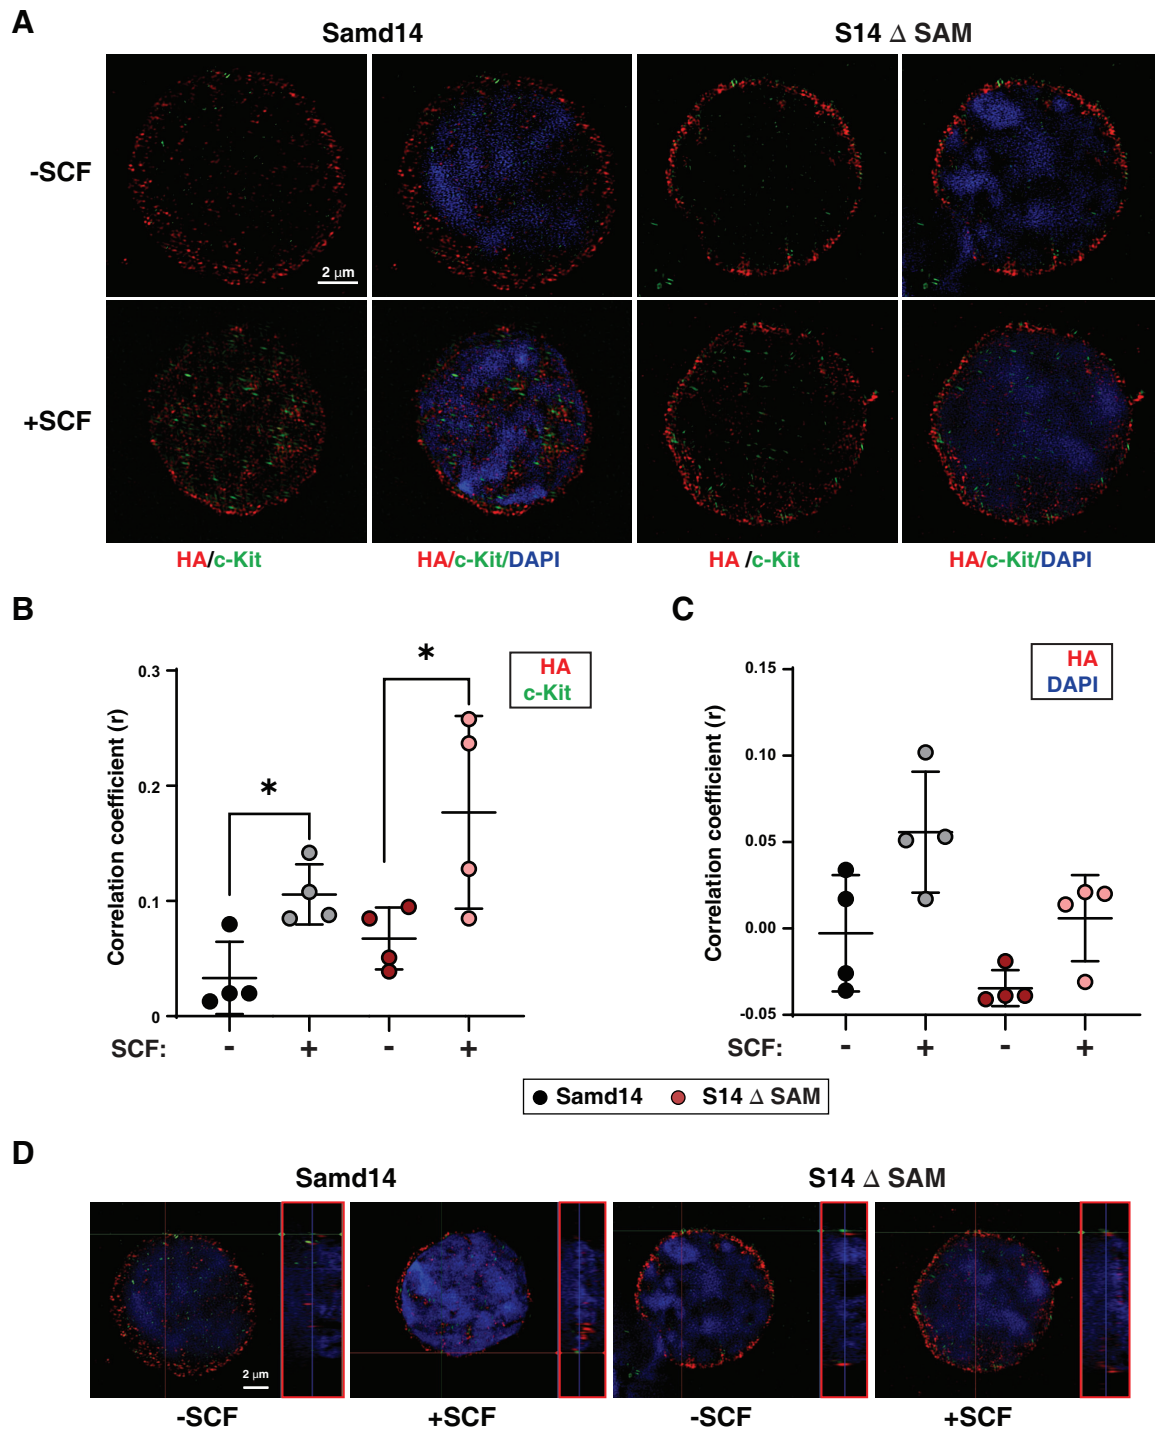

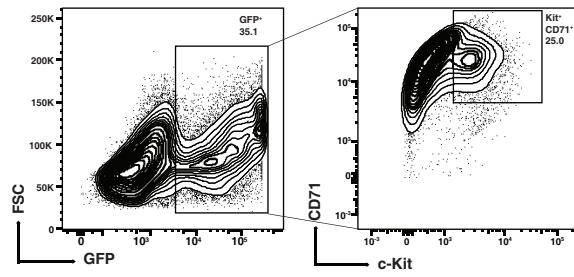

**A**

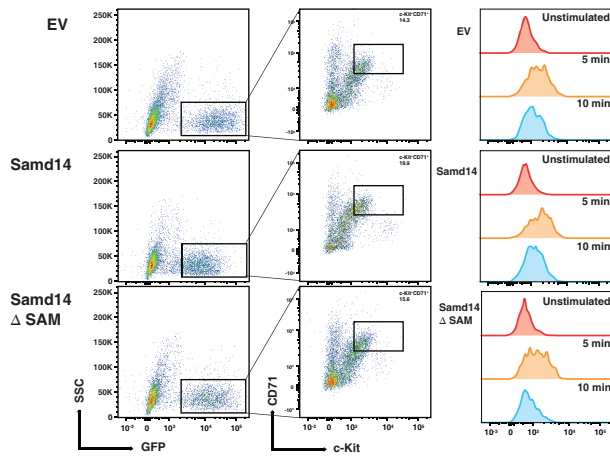

**B**

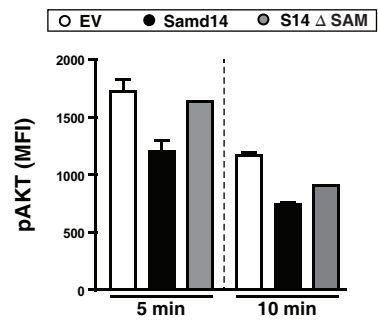



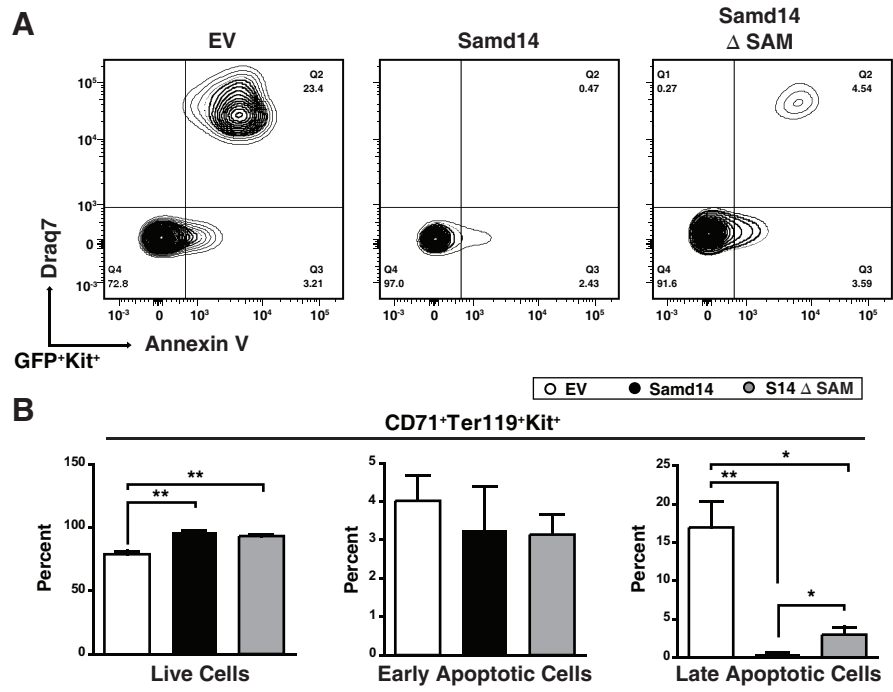

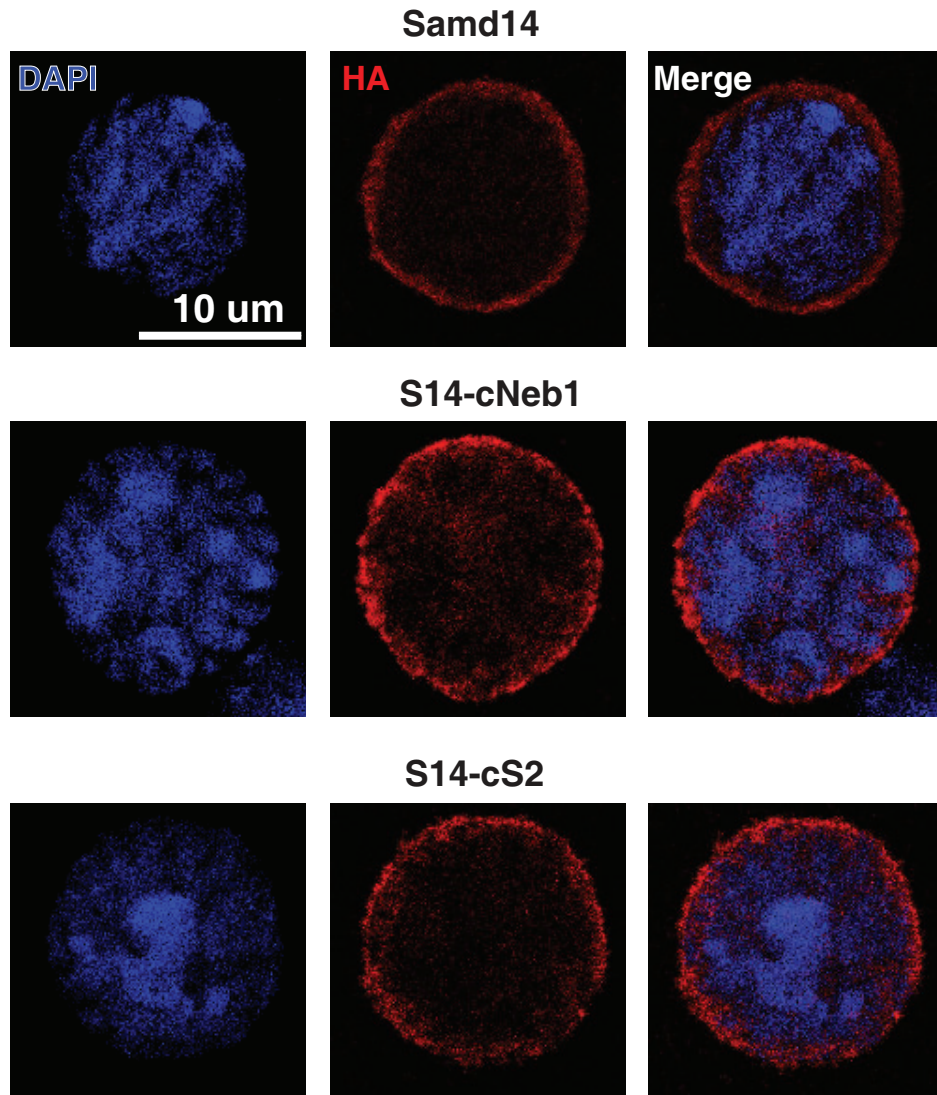

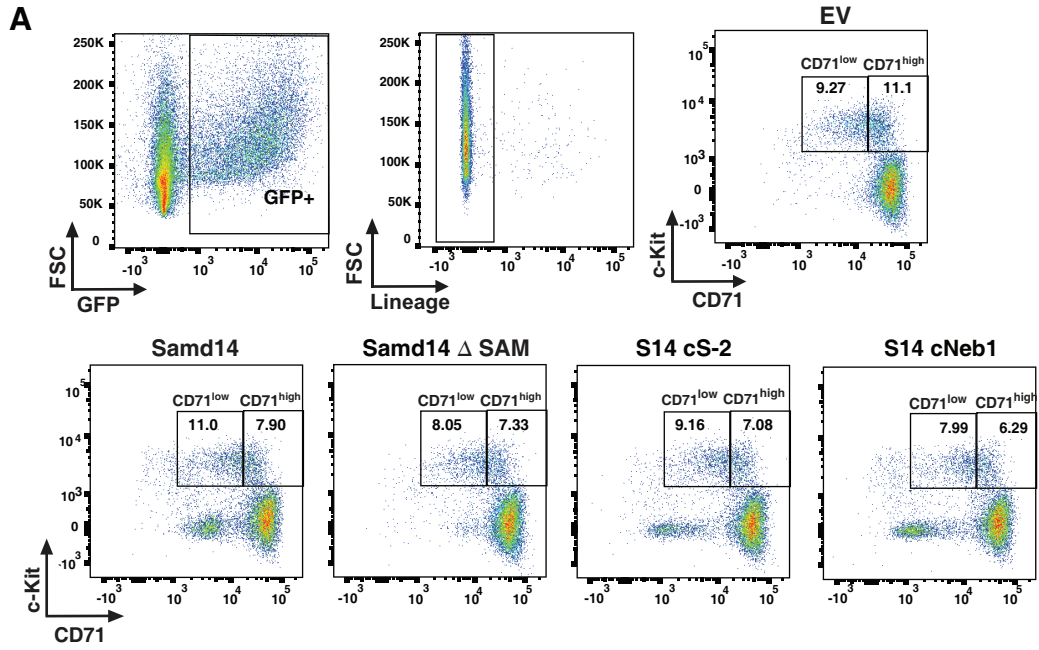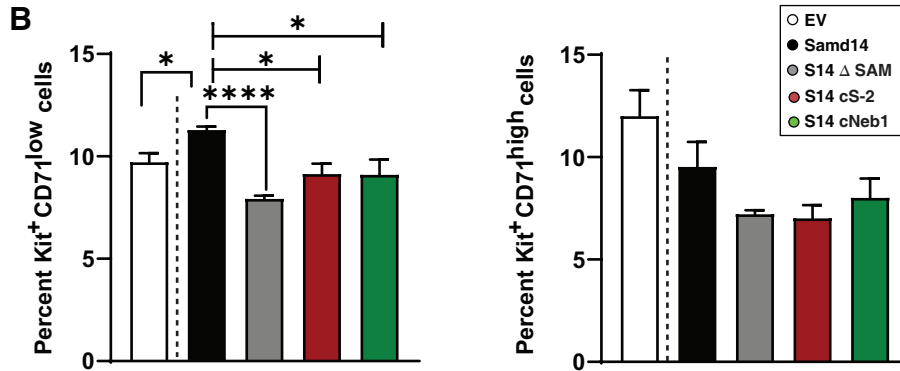

Supplement: supp_RA119.011895_157109_2_supp_503379_q83f55.pdf [file supp_RA119.011895_157109_2_supp_503379_q83f55.pdf]
